# Supplementary material
Source: HighWire-hosted journal article supplement (https://nutrition.bmj.com/content/6/1/6)
Supplement: inline-supplementary-material-1 [file inline-supplementary-material-1.pdf]

| Supplemental Table 1. Partner Sites                                                     |
|-----------------------------------------------------------------------------------------|
| California Health Sciences University, Clovis, CA                                       |
| George Washington University, Washington, D.C.                                          |
| Lake Erie College of Osteopathic Medicine, Elvira NY, Erie, PA, Bradenton, FL           |
| Maine Medical Center, Portland, ME                                                      |
| NOVA Southeastern University, Ft. Lauderdale, FL                                        |
| New York Medical College, Valhalla, NY                                                  |
| Philadelphia College of Osteopathic Medicine, Philadelphia, PA                          |
| Spectrum Health, Grand Rapids Michigan                                                  |
| St. Joseph Mercy Health System, Ann Arbor, MI                                           |
| Touro University California, Vallejo, CA                                                |
| Tulane University, New Orleans, LA                                                      |
| Uniformed Services University, Washington, D.C                                          |
| University of California-Irvine GI Department, Irvine, CA                               |
| University of Central Florida, Orlando, FL                                              |
| University of New Mexico, Albuquerque, NM                                               |
| University of North Texas, Denton, TX                                                   |
| University of Tennessee, Memphis, TN                                                    |
| University of Texas-Southwestern Medical School + Moncrief Cancer Institute, Dallas, TX |
| Zucker School of Medicine, Hempstead, N.Y.                                              |
