# Supplementary material
Source: HighWire-hosted journal article supplement (https://nutrition.bmj.com/content/6/1/6)
Supplement: inline-supplementary-material-2 [file inline-supplementary-material-2.pdf]

**Supplementary Table 2.** Assessment of Mediterranean diet adherence

| <b>Mediterranean Diet Category</b>                                                 | <b>Serving Requirement</b>                                                     | <b>0</b> | <b>+1</b> |
|------------------------------------------------------------------------------------|--------------------------------------------------------------------------------|----------|-----------|
| Vegetables (e.g. carrots, spinach, tomatoes).                                      | 4 or more servings per-day                                                     |          |           |
| Legumes (e.g. beans, split peas, or lentils)                                       | 1 or more servings per week                                                    |          |           |
| Fruits (e.g. oranges, apples, bananas)                                             | 3 or more servings per week                                                    |          |           |
| Nuts, seeds, or nut butters (e.g. peanuts, almonds, cashews)                       | 1 or more servings per week                                                    |          |           |
| Red and processed meat (e.g. hamburgers, steak, hotdogs)                           | Less than 2 servings per week for women, less than 3 servings per week for men |          |           |
| Non-fried fish or seafood (e.g. canned, baked, grilled)                            | 2 or more servings per week                                                    |          |           |
| Whole grains<br>(e.g. whole wheat bread or pasta, oats, brown rice, corn tortilla) | 1 or more servings per day                                                     |          |           |
| Monounsaturated fats (e.g. avocado, olive or canola oils)                          | Higher reported intake of unsaturated fats versus saturated fats               |          |           |
| Alcohol                                                                            | (1/2 to 1 drink per day for women, 1-2 drinks per day for men)                 |          |           |
