# Supplementary material
Source: HighWire-hosted journal article supplement (https://nutrition.bmj.com/content/6/1/6)
Supplement: inline-supplementary-material-3 [file inline-supplementary-material-3.pdf]

**Supplementary Table 3.** Assessment of nutritional attitudes and core lifestyle medicine counseling competencies

| <b>Attitudes</b>                                                                                                | Not at all confident or Somewhat confident | Neither not at all confident, or totally confident | Mostly confident to totally confident |
|-----------------------------------------------------------------------------------------------------------------|--------------------------------------------|----------------------------------------------------|---------------------------------------|
| Nutritional counseling should be included in any routine appointment, just like diagnosis and treatment.        |                                            |                                                    |                                       |
| Specific advice about how to make dietary changes could help patients improve their eating habits.              |                                            |                                                    |                                       |
| Physicians can have an effect on a patient's dietary behavior if they take the time to discuss the problem. (5) |                                            |                                                    |                                       |
| <b>Lifestyle Medicine Counseling</b>                                                                            |                                            |                                                    |                                       |
| Mediterranean Diet and its health effects.                                                                      |                                            |                                                    |                                       |
| DASH diet and its health effects.                                                                               |                                            |                                                    |                                       |
| Vegetarian diet and its health effects                                                                          |                                            |                                                    |                                       |
| Very low-fat diet and its health effects.                                                                       |                                            |                                                    |                                       |
| High protein/high fat diet (e.g. Atkins) and its health effects.                                                |                                            |                                                    |                                       |
| Examples of a serving size from the 2011 "My Plate" guidelines.                                                 |                                            |                                                    |                                       |
| Definition of moderate alcohol consumption and its health effects.                                              |                                            |                                                    |                                       |
| Recognizing warning signs and symptoms of patients with eating disorders.                                       |                                            |                                                    |                                       |
| Role of dietary cholesterol and saturated fat in blood lipids.                                                  |                                            |                                                    |                                       |
| Recommended dietary patterns for type 2 diabetes.                                                               |                                            |                                                    |                                       |

|                                                                                        |  |
|----------------------------------------------------------------------------------------|--|
| Significance of modest weight loss for type 2 diabetes.                                |  |
| Weight loss strategies in overweight or obese patients.                                |  |
| Role of Omega-3 and -6 fatty acids in heart health and their food examples.            |  |
| Role of dietary fat types (e.g. saturated vs. other) and their food examples.          |  |
| Identifying antioxidant-rich grocery produce.                                          |  |
| Calories per gram of protein, carbohydrate and fat, and their basic metabolic roles.   |  |
| Role of hydration in health, and fluid needs based on activity and age.                |  |
| Celiac disease and management strategies for patient's diet and lifestyle.             |  |
| Food allergies and management strategies for patient's diet and lifestyle.             |  |
| The role of glycemic index and load in dietary management.                             |  |
| Fiber in disease prevention, and example ingredients.                                  |  |
| Assessing the total calories, saturated fat, and sodium using the food label.          |  |
| Osteoporosis and prevention and treatment strategies for patient's diet and lifestyle. |  |
| Calculation of body mass index (BMI) and waist-to-hip ratio based on gender.           |  |
| Overall benefits of aerobic exercise on health and well-being.                         |  |
