# Supplementary material
Source: HighWire-hosted journal article supplement (https://nutrition.bmj.com/content/6/1/6)
Supplement: inline-supplementary-material-4 [file inline-supplementary-material-4.pdf]

**Supplemental Table 4. Dietary habits over the last 6 months**

|                                                                                             | Once per month /<br>Never | 1-2 times<br>per week | 3-5 times<br>per week | 7 times per<br>week (daily) | 2 or more<br>times daily |
|---------------------------------------------------------------------------------------------|---------------------------|-----------------------|-----------------------|-----------------------------|--------------------------|
| Vegetables<br>(e.g. carrots, spinach, tomatoes)                                             |                           |                       |                       |                             |                          |
| Legumes<br>(e.g. beans, split peas, or lentils)                                             |                           |                       |                       |                             |                          |
| Fruits<br>(e.g. oranges, apples, bananas)                                                   |                           |                       |                       |                             |                          |
| Nuts or nut butters<br>(e.g. peanuts, almonds, cashews)                                     |                           |                       |                       |                             |                          |
| Cheese or fermented dairy<br>(e.g. yogurt)                                                  |                           |                       |                       |                             |                          |
| Red and processed meat<br>(e.g. hamburgers, steak, hotdogs)                                 |                           |                       |                       |                             |                          |
| Non-fried fish or seafood<br>(e.g. canned, baked, grilled)                                  |                           |                       |                       |                             |                          |
| Whole grains<br>(e.g. whole wheat bread or pasta, oats,<br>brown rice, corn tortilla)       |                           |                       |                       |                             |                          |
| Monounsaturated fats<br>(e.g. olive oil, avocado, canola oil).                              |                           |                       |                       |                             |                          |
| 1 alcohol serving<br>(1 can of 12 oz. beer = 1 glass of wine = 1<br>shot of spirits)        |                           |                       |                       |                             |                          |
| Baked products<br>(e.g. muffins, doughnuts, pastries)                                       |                           |                       |                       |                             |                          |
| Calorie-containing beverages<br>(e.g. coke/soda, non-black coffee drinks,<br>energy drinks) |                           |                       |                       |                             |                          |
| Saturated fats<br>(e.g. butter, 2% or whole milk, margarine)                                |                           |                       |                       |                             |                          |
